# Supplementary material for: A More Robust Gut Microbiota in Calorie-Restricted Mice Is Associated with Attenuated Intestinal Injury Caused by the Chemotherapy Drug Cyclophosphamide
Source: PubMed Central journal article supplement (PMC6414708; doi:10.1128/mbio.02903-18), 2019-03-12

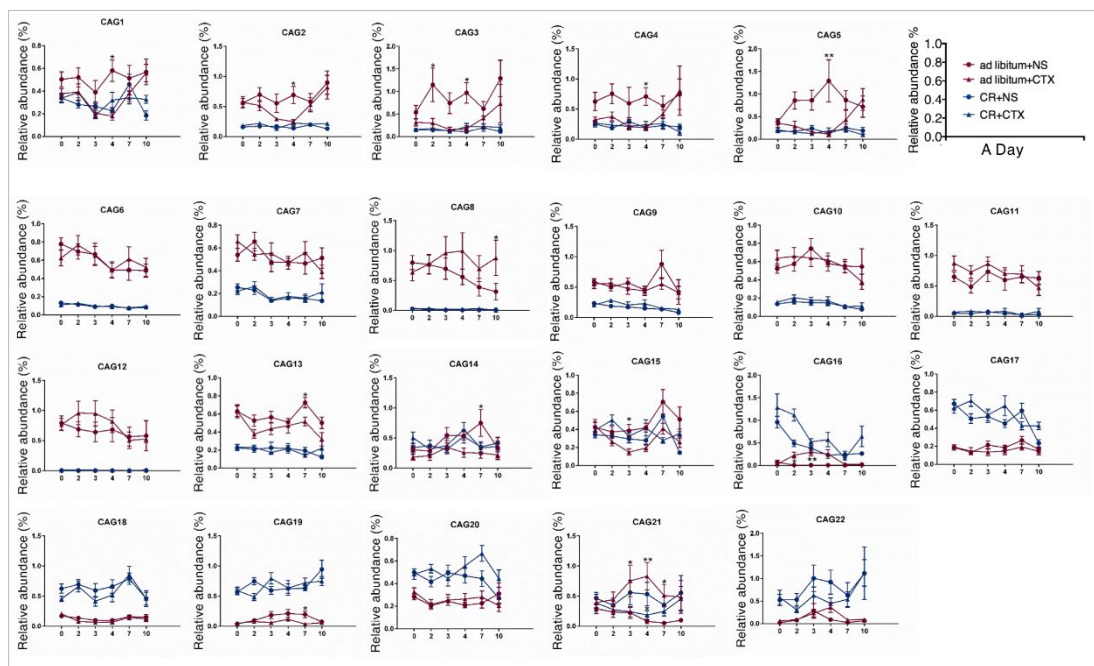

Supplement: mBio.02903-18-sf006.pdf [file mBio.02903-18-sf006.pdf]
