# Supplementary material for: A More Robust Gut Microbiota in Calorie-Restricted Mice Is Associated with Attenuated Intestinal Injury Caused by the Chemotherapy Drug Cyclophosphamide
Source: PubMed Central journal article supplement (PMC6414708; doi:10.1128/mbio.02903-18), 2019-03-12
Supplement: mBio.02903-18-st001.pdf [file mBio.02903-18-st001.pdf]

Table S1 The effects of microbiota structure by CTX in *ad libitum* and CR group.

|                                                        | A0d    | A2d    | A3d    | A4d    | A7d    | A10d   |
|--------------------------------------------------------|--------|--------|--------|--------|--------|--------|
| <i>ad libitum</i> +NS<br>VS.<br><i>ad libitum</i> +CTX | 0.1557 | 0.0878 | 0.0283 | 0.0008 | 0.0135 | 0.4578 |
| CR+NS VS.<br>CR+CTX                                    | 0.6114 | 0.0173 | 0.227  | 0.5187 | 0.6621 | 0.3415 |
